# Supplementary material
Source: publisher figshare collection journal article supplement (https://frontiersin.figshare.com/ndownloader/files/10872737)
Supplement: Supplementary file [file 10872737]

## Supplementary Material

### Gaussian-based smooth dielectric function: A surface-free approach for modeling macromolecular binding in solvents

Arghya Chakravorty<sup>1</sup>, Zhe Jia<sup>1</sup>, Yunhui Peng<sup>1</sup>, Nayere Tajjelyato<sup>1</sup>, Lisi Wang<sup>2</sup>, Emil Alexov<sup>1\*</sup>

<sup>1</sup>Computational Biophysics and Bioinformatics, Department of Physics and Astronomy, Clemson University, SC, USA

<sup>2</sup>Department of Chemistry, Clemson University, SC, USA

**Table S1.** Comparisons of performance of traditional 2-dielectric and Gaussian-based methods against experimental data and observable phenomena.

|                                                                                                                                                                                                                                                                                                      | Traditional 2-dielectric method                                                                 | Gaussian-based dielectric method                                                                         |
|------------------------------------------------------------------------------------------------------------------------------------------------------------------------------------------------------------------------------------------------------------------------------------------------------|-------------------------------------------------------------------------------------------------|----------------------------------------------------------------------------------------------------------|
| pKa modeling: RMSD (calculated vs experimental) of 89 pKa's of SNase (J. Chem. Theory Comput. 2013, 9, 2126–2136)                                                                                                                                                                                    | 2.43 pH units                                                                                   | 1.77 pH units                                                                                            |
| Binding free energy changes upon 105 mutations (calculated vs experimental). (Bioinformatics. 2017 Oct 28. doi: 10.1093/bioinformatics/btx69)                                                                                                                                                        | 0.62kcal/mol                                                                                    | 0.54kcal/mol                                                                                             |
| Electron transfer in Bacterial Reaction Center: red – negative; blue - positive. Electron is supposed to be transferred from Qa→Qb. In traditional model, the electrostatic potential opposes the transfer, while in Gaussian-based model, it is almost neutral (Qa and Qb have similar potentials). | <b>a</b><br>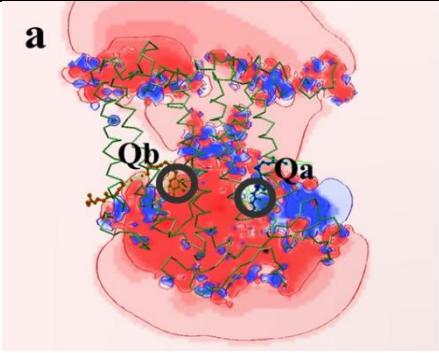 | <b>b</b><br>        |
| Linkage to the physical properties of amino acids ((J. Chem. Theory Comput. 2013, 9, 2126–2136).                                                                                                                                                                                                     | Hydrophobic and hydropilic acids are assigned the same dielectric constant                      | Hydrophobic acids are assigned lower dielectric constant as compared with hydrophilic and polar residues |
